# Supplementary material for: Transcriptomics reveals the molecular processes of light-induced rapid darkening of the non-obligate cave dweller Oreolalax rhodostigmatus (Megophryidae, Anura) and their genetic basis of pigmentation strategy
Source: PubMed Central journal article supplement (PMC5984452; doi:10.1186/s12864-018-4790-y), 2018-05-31

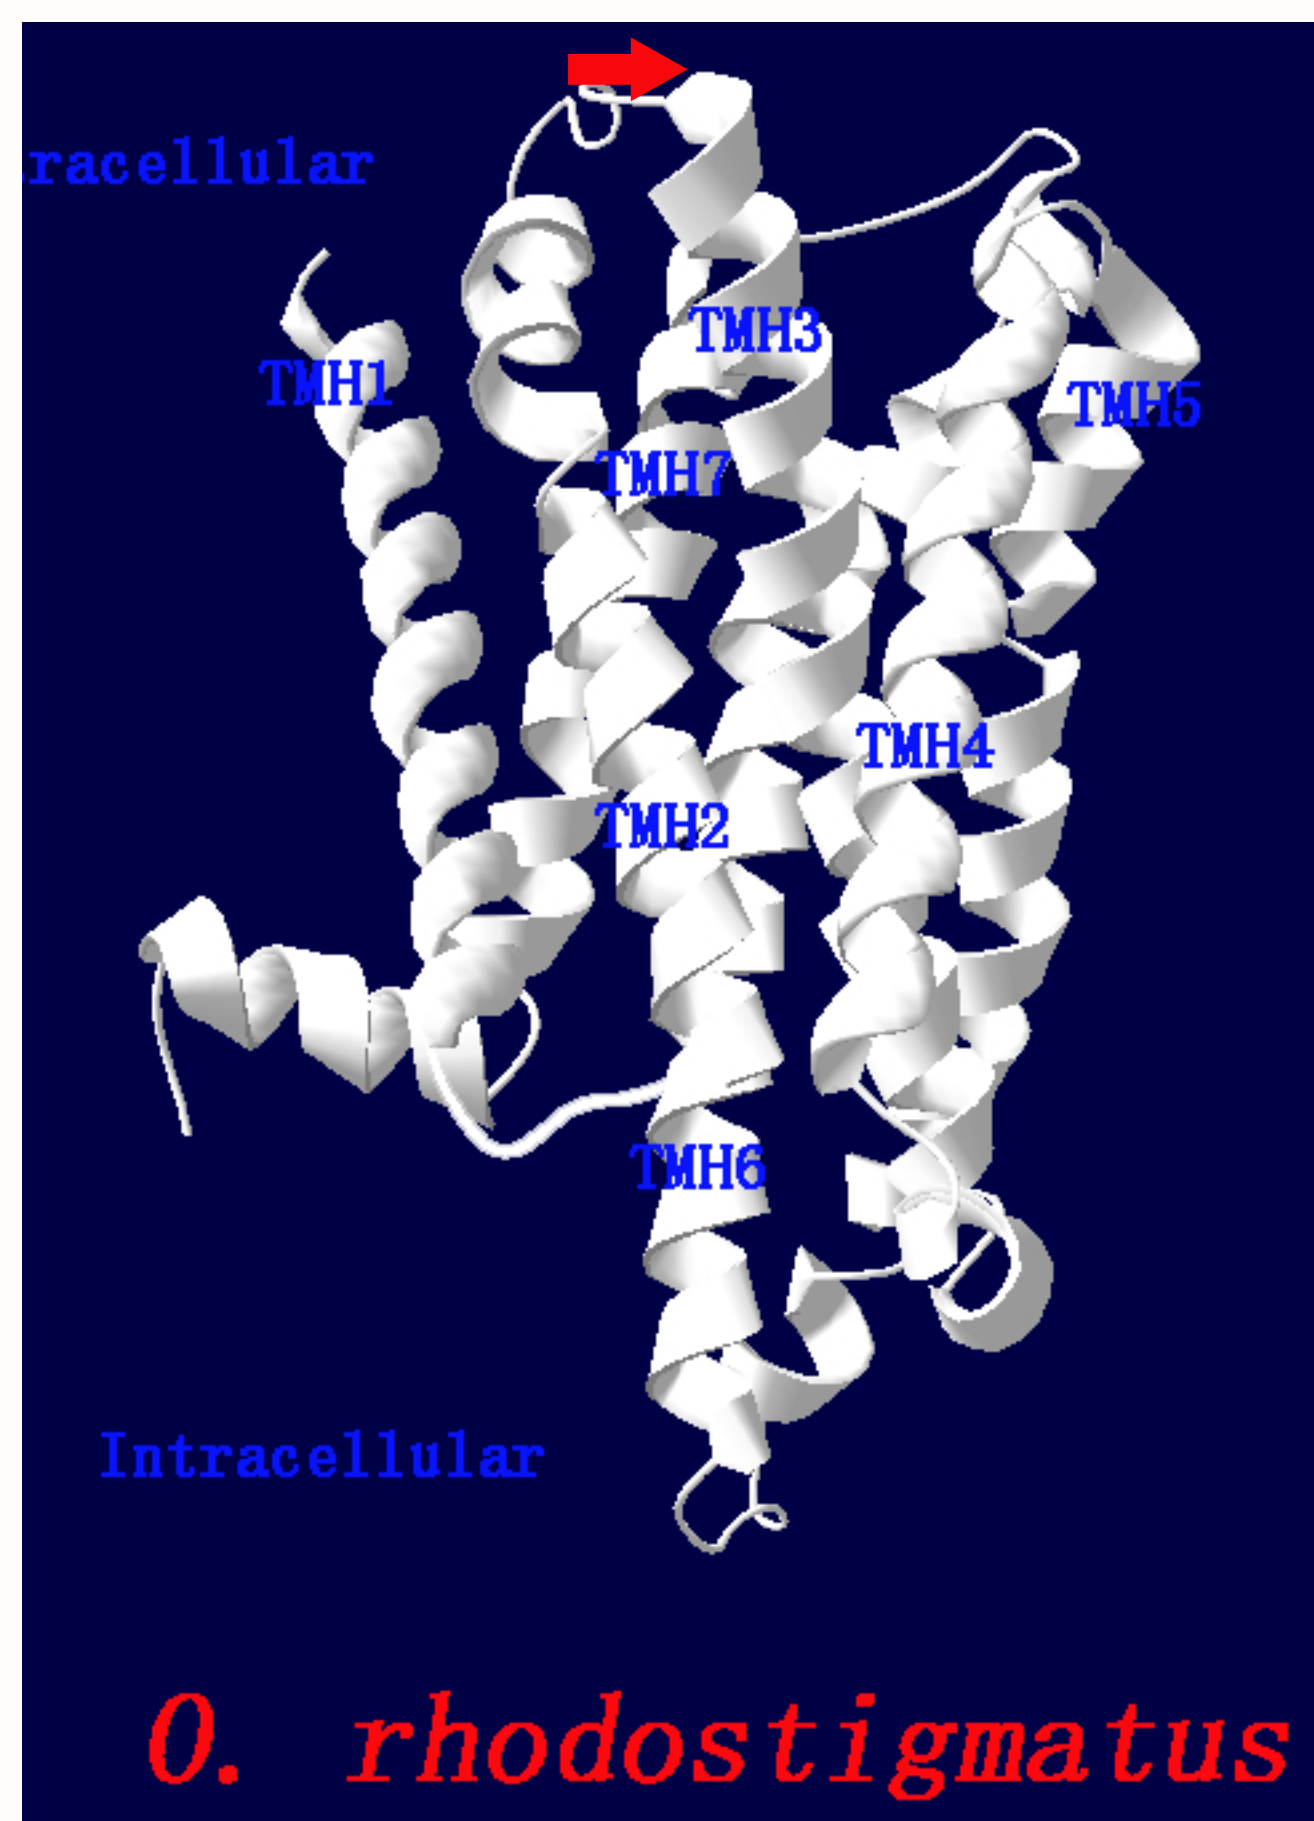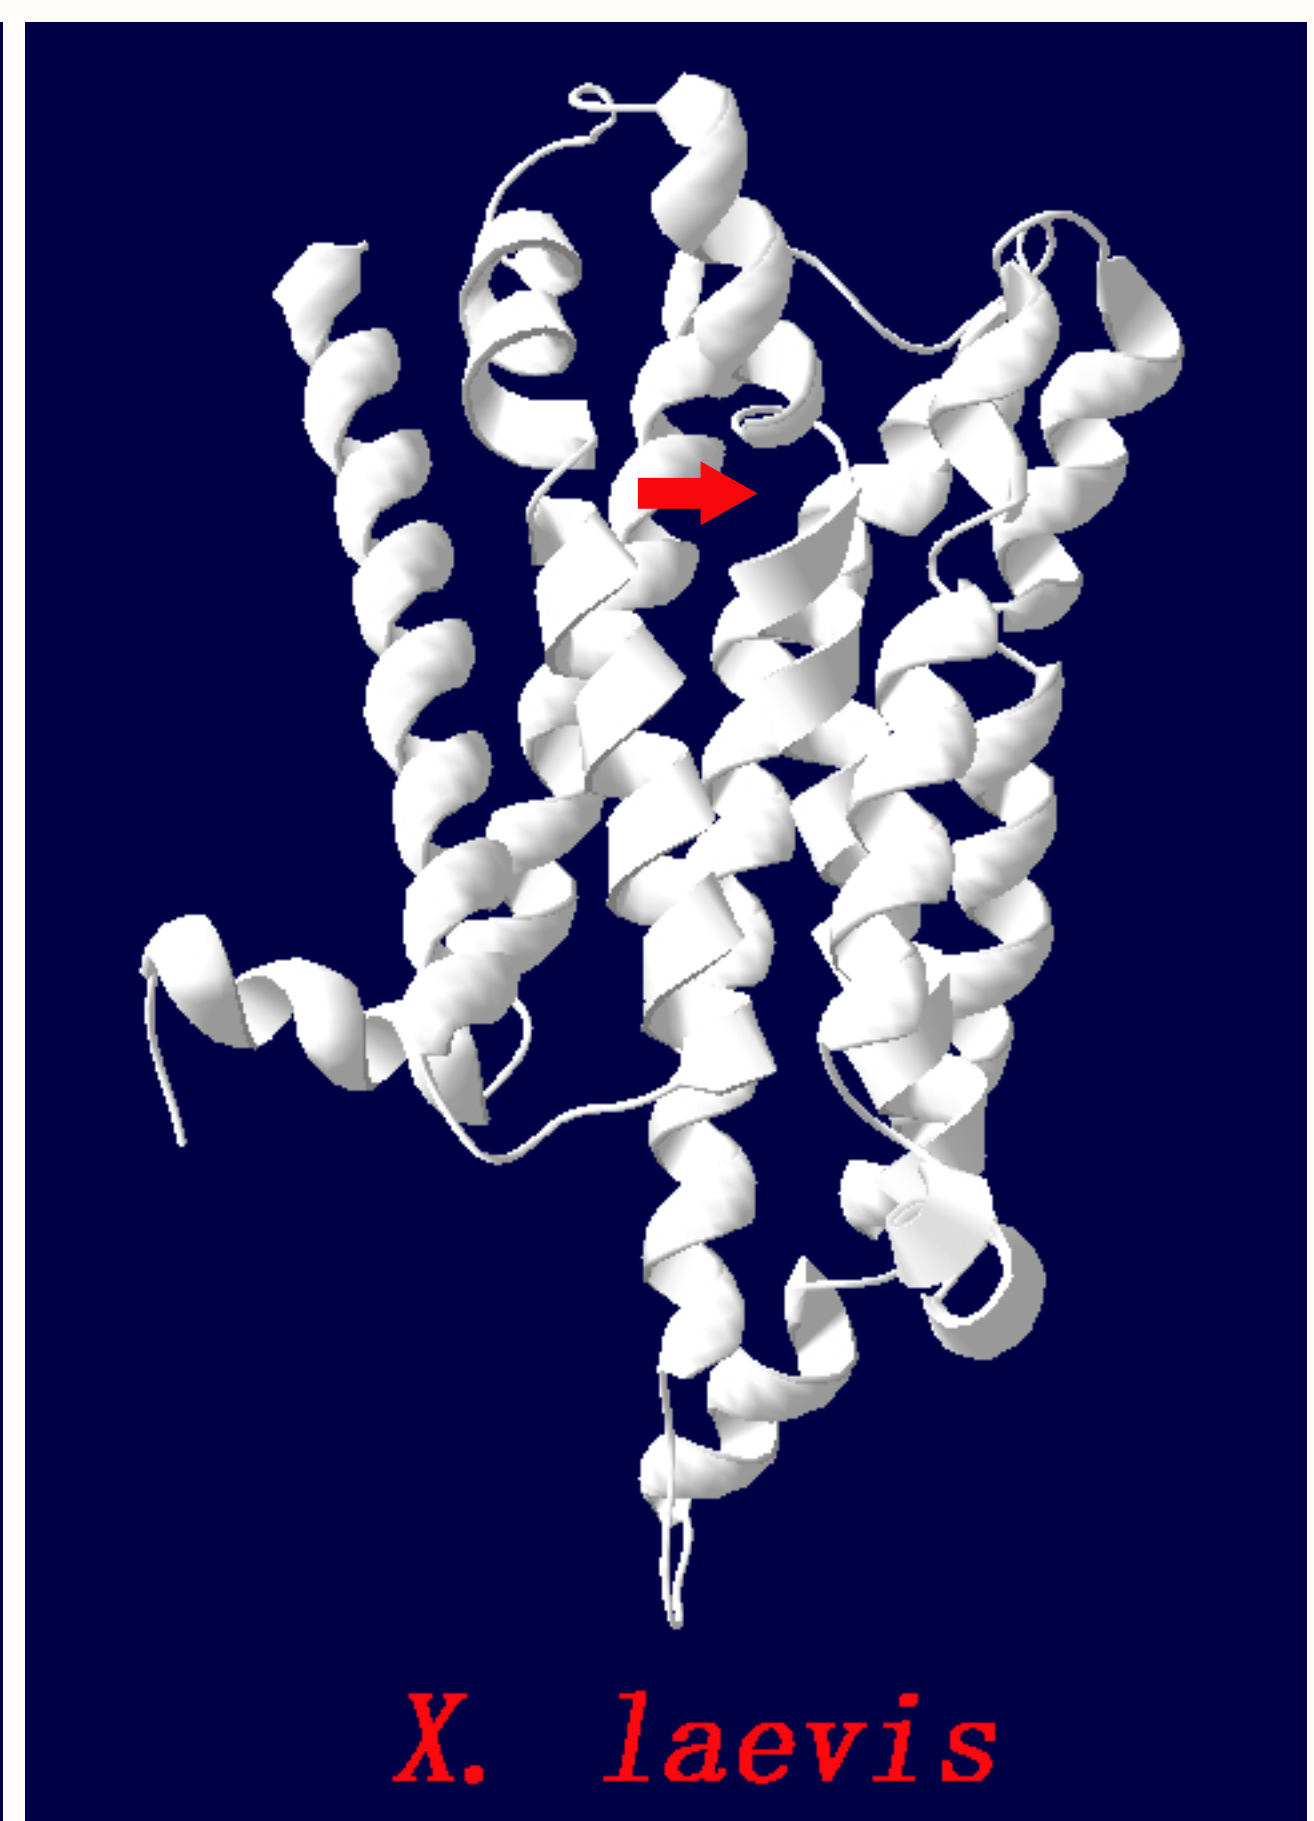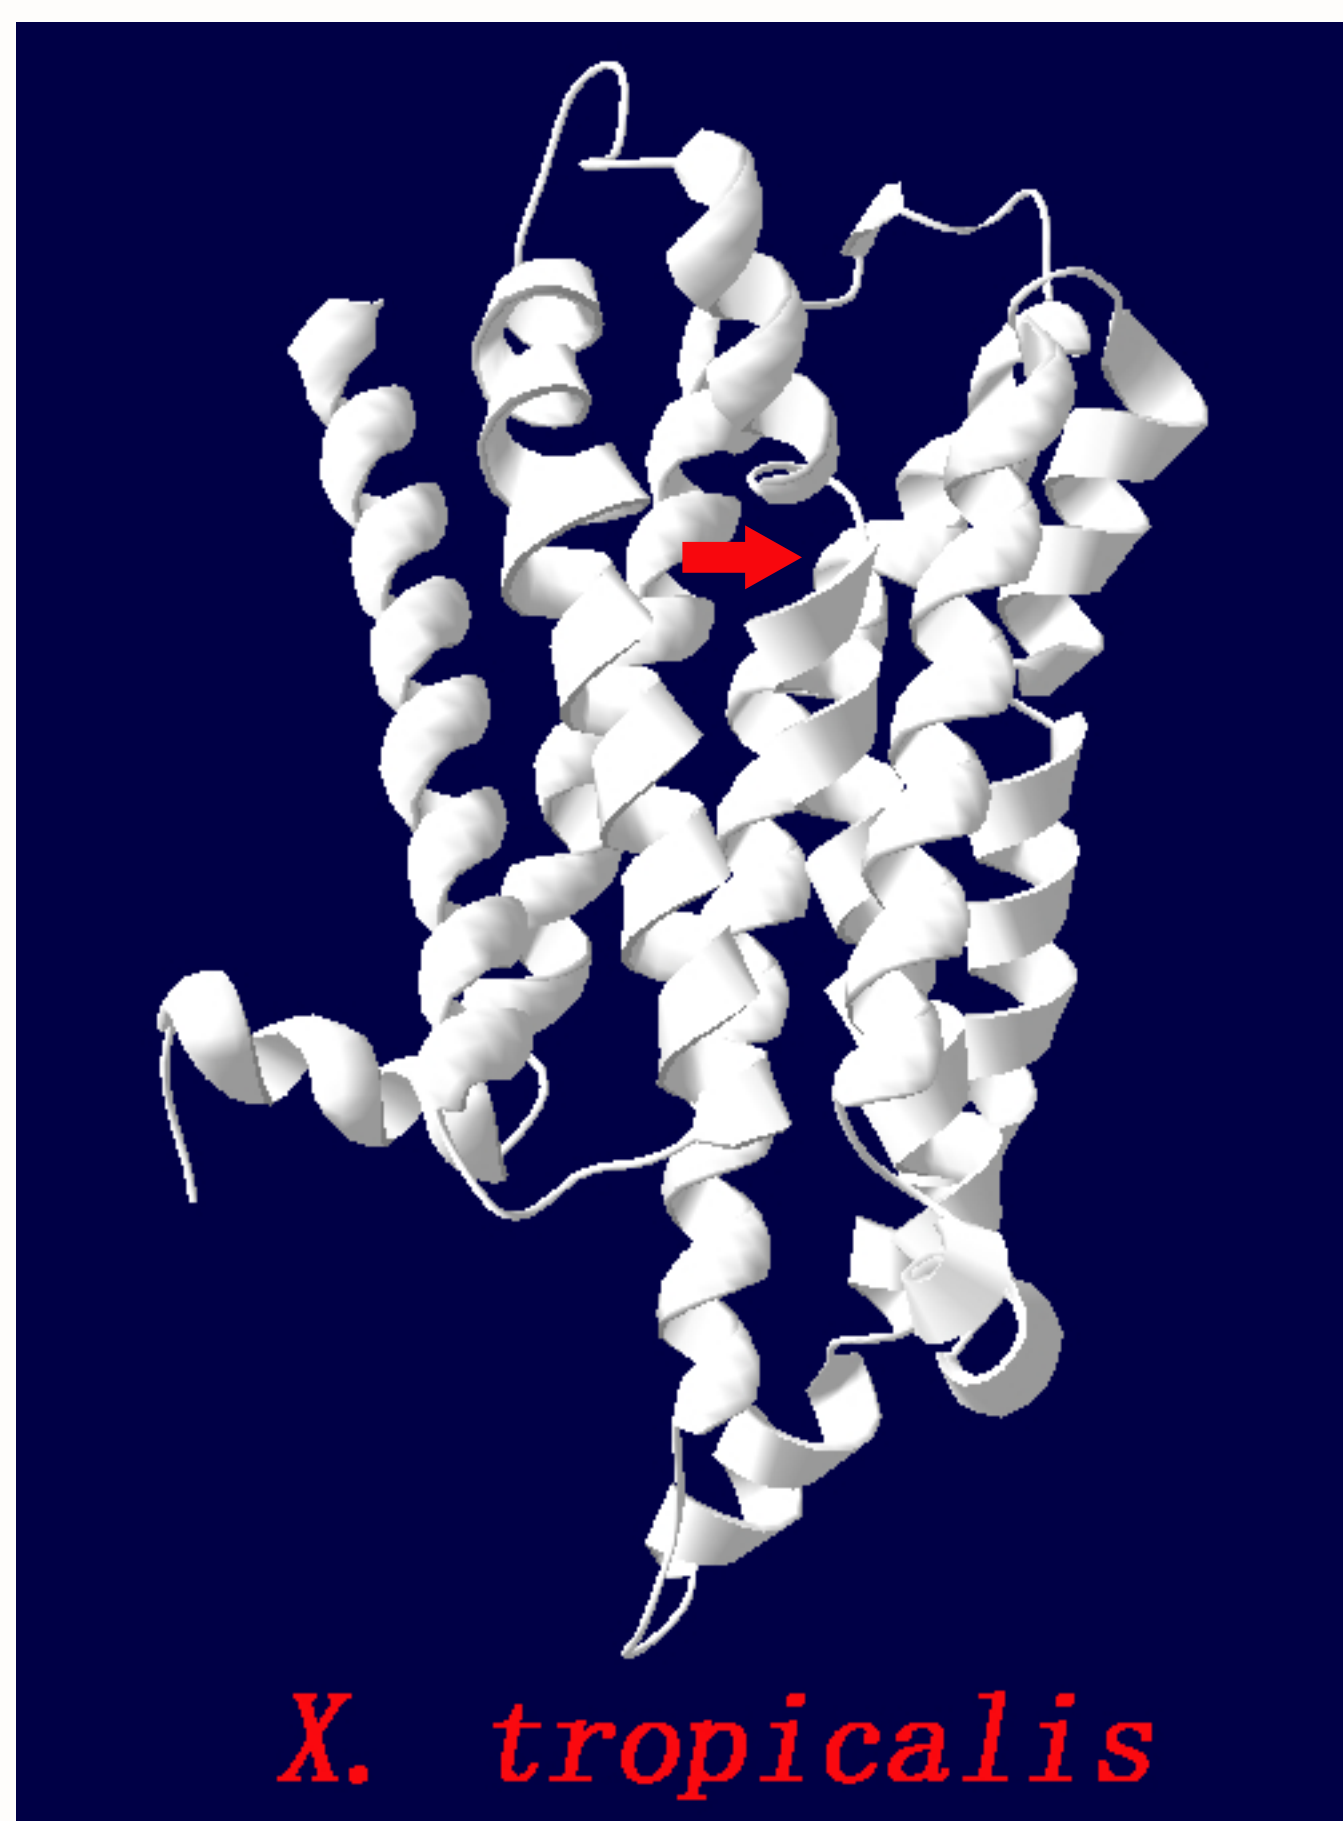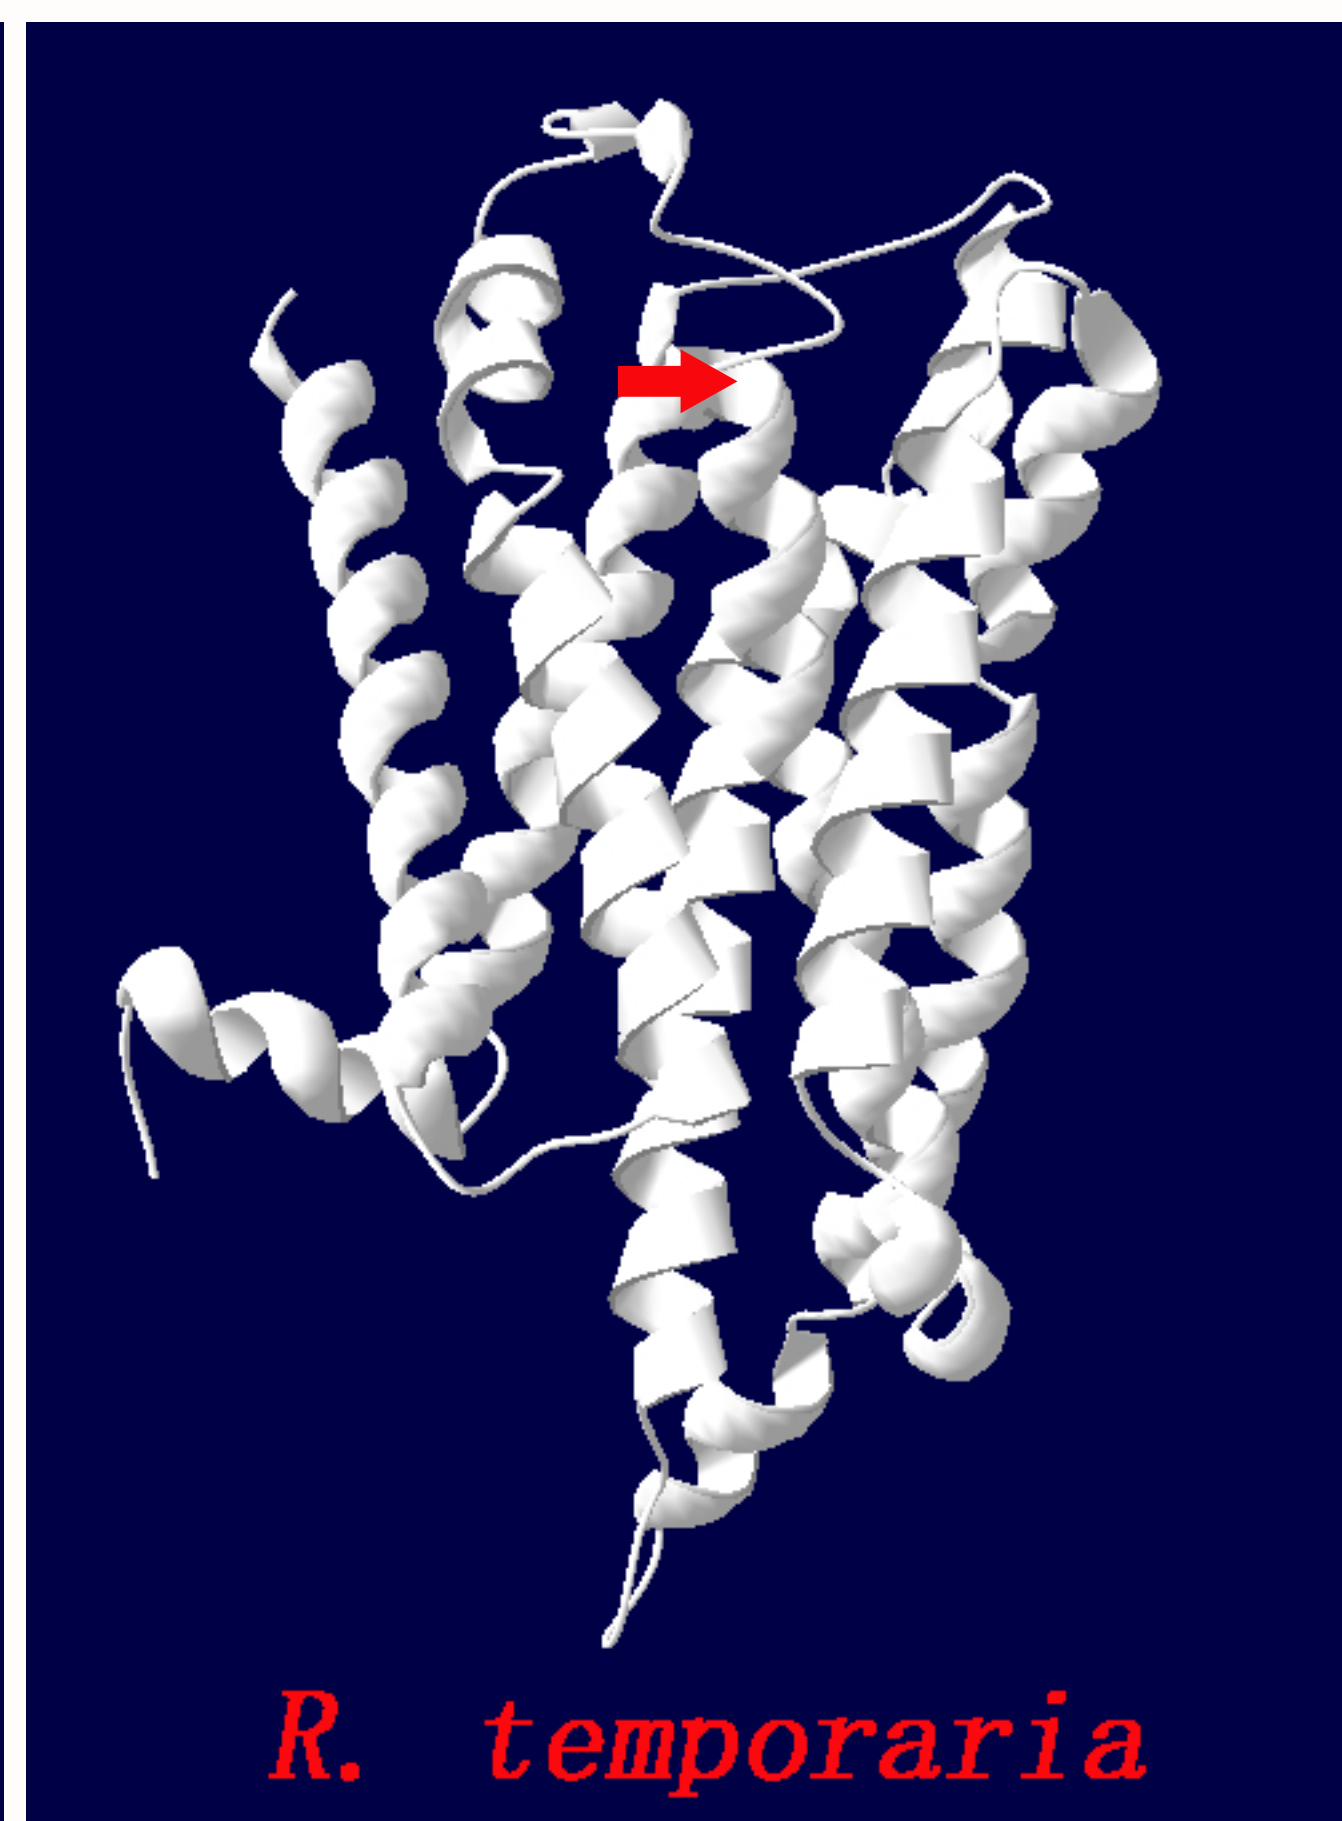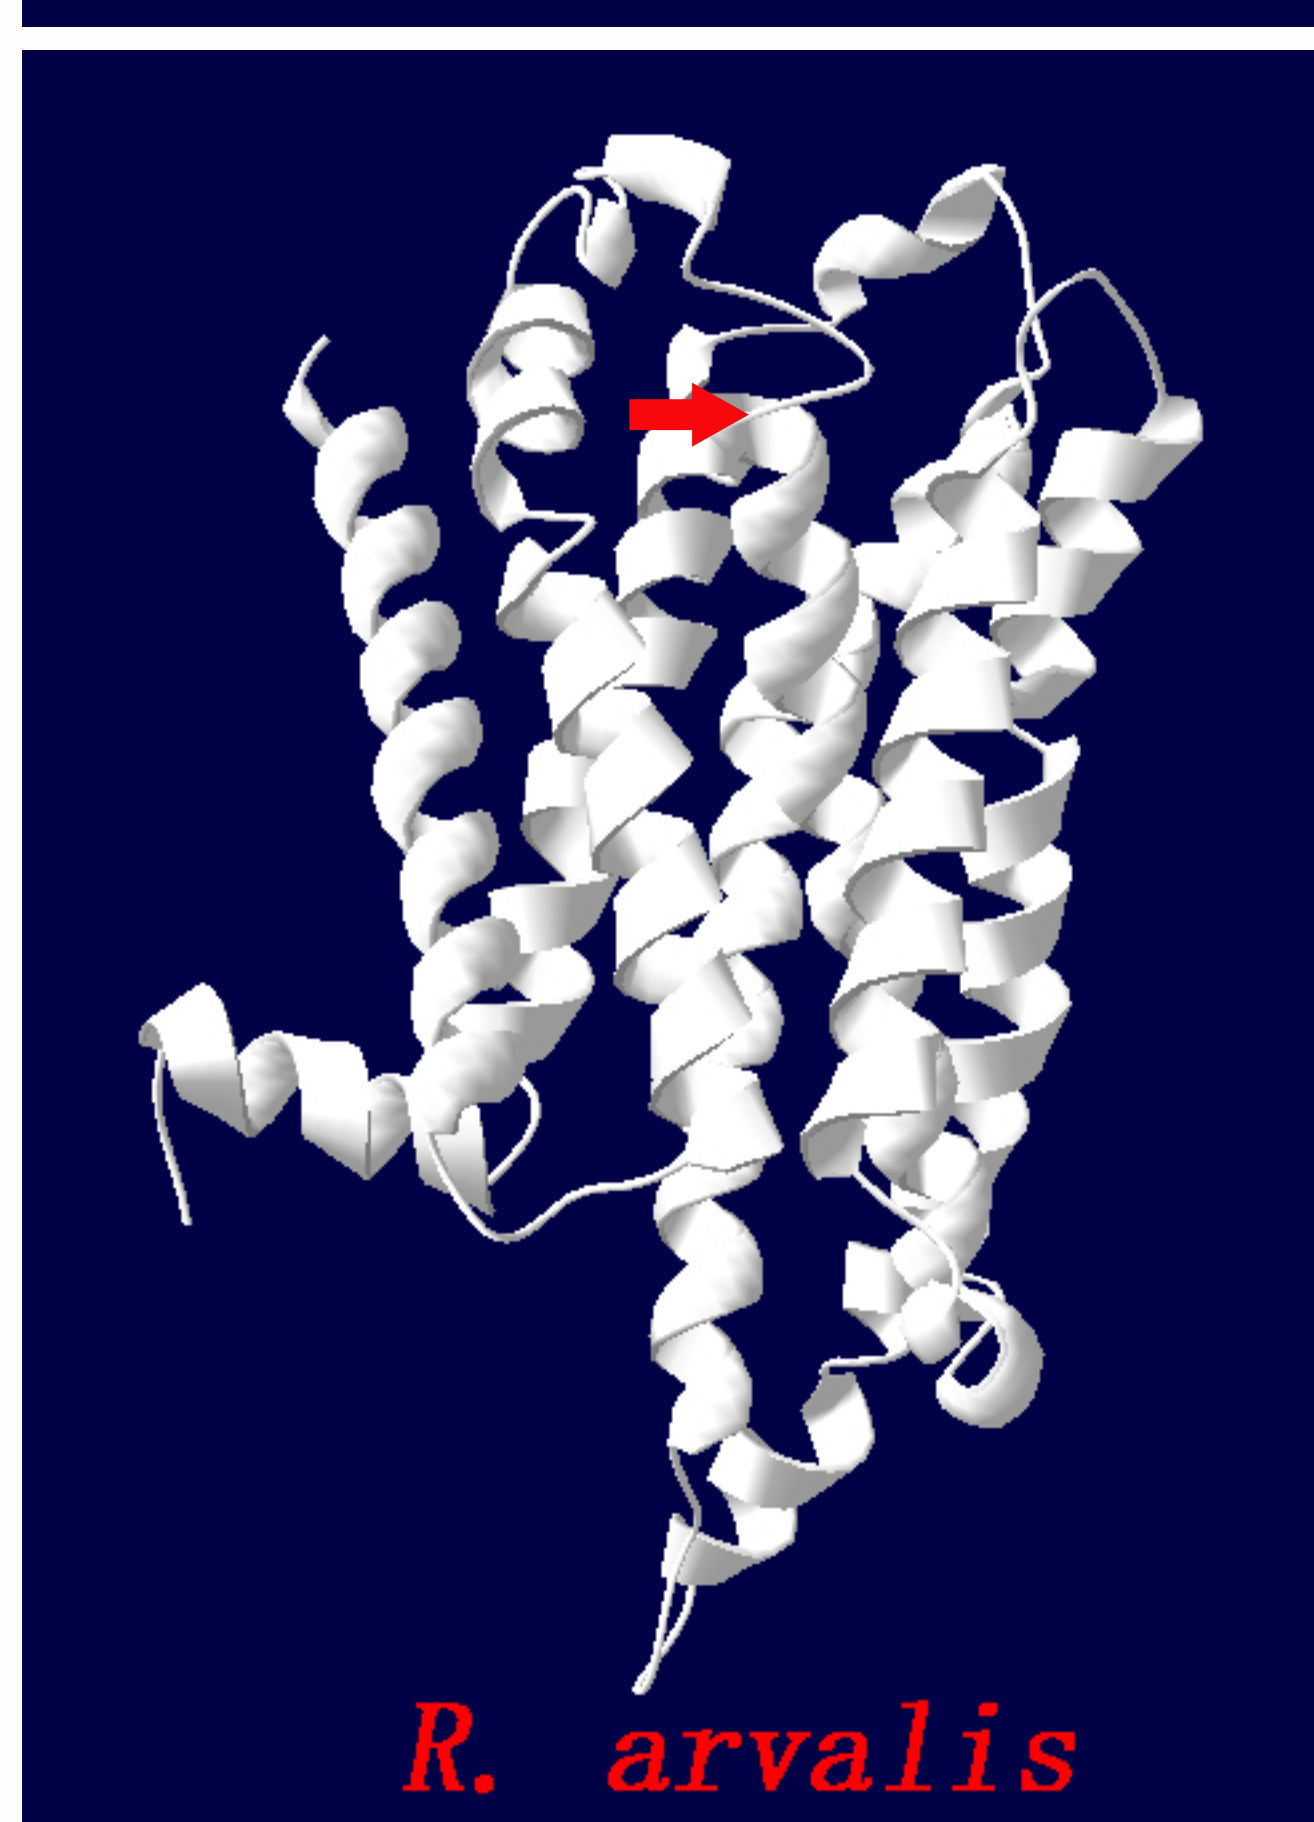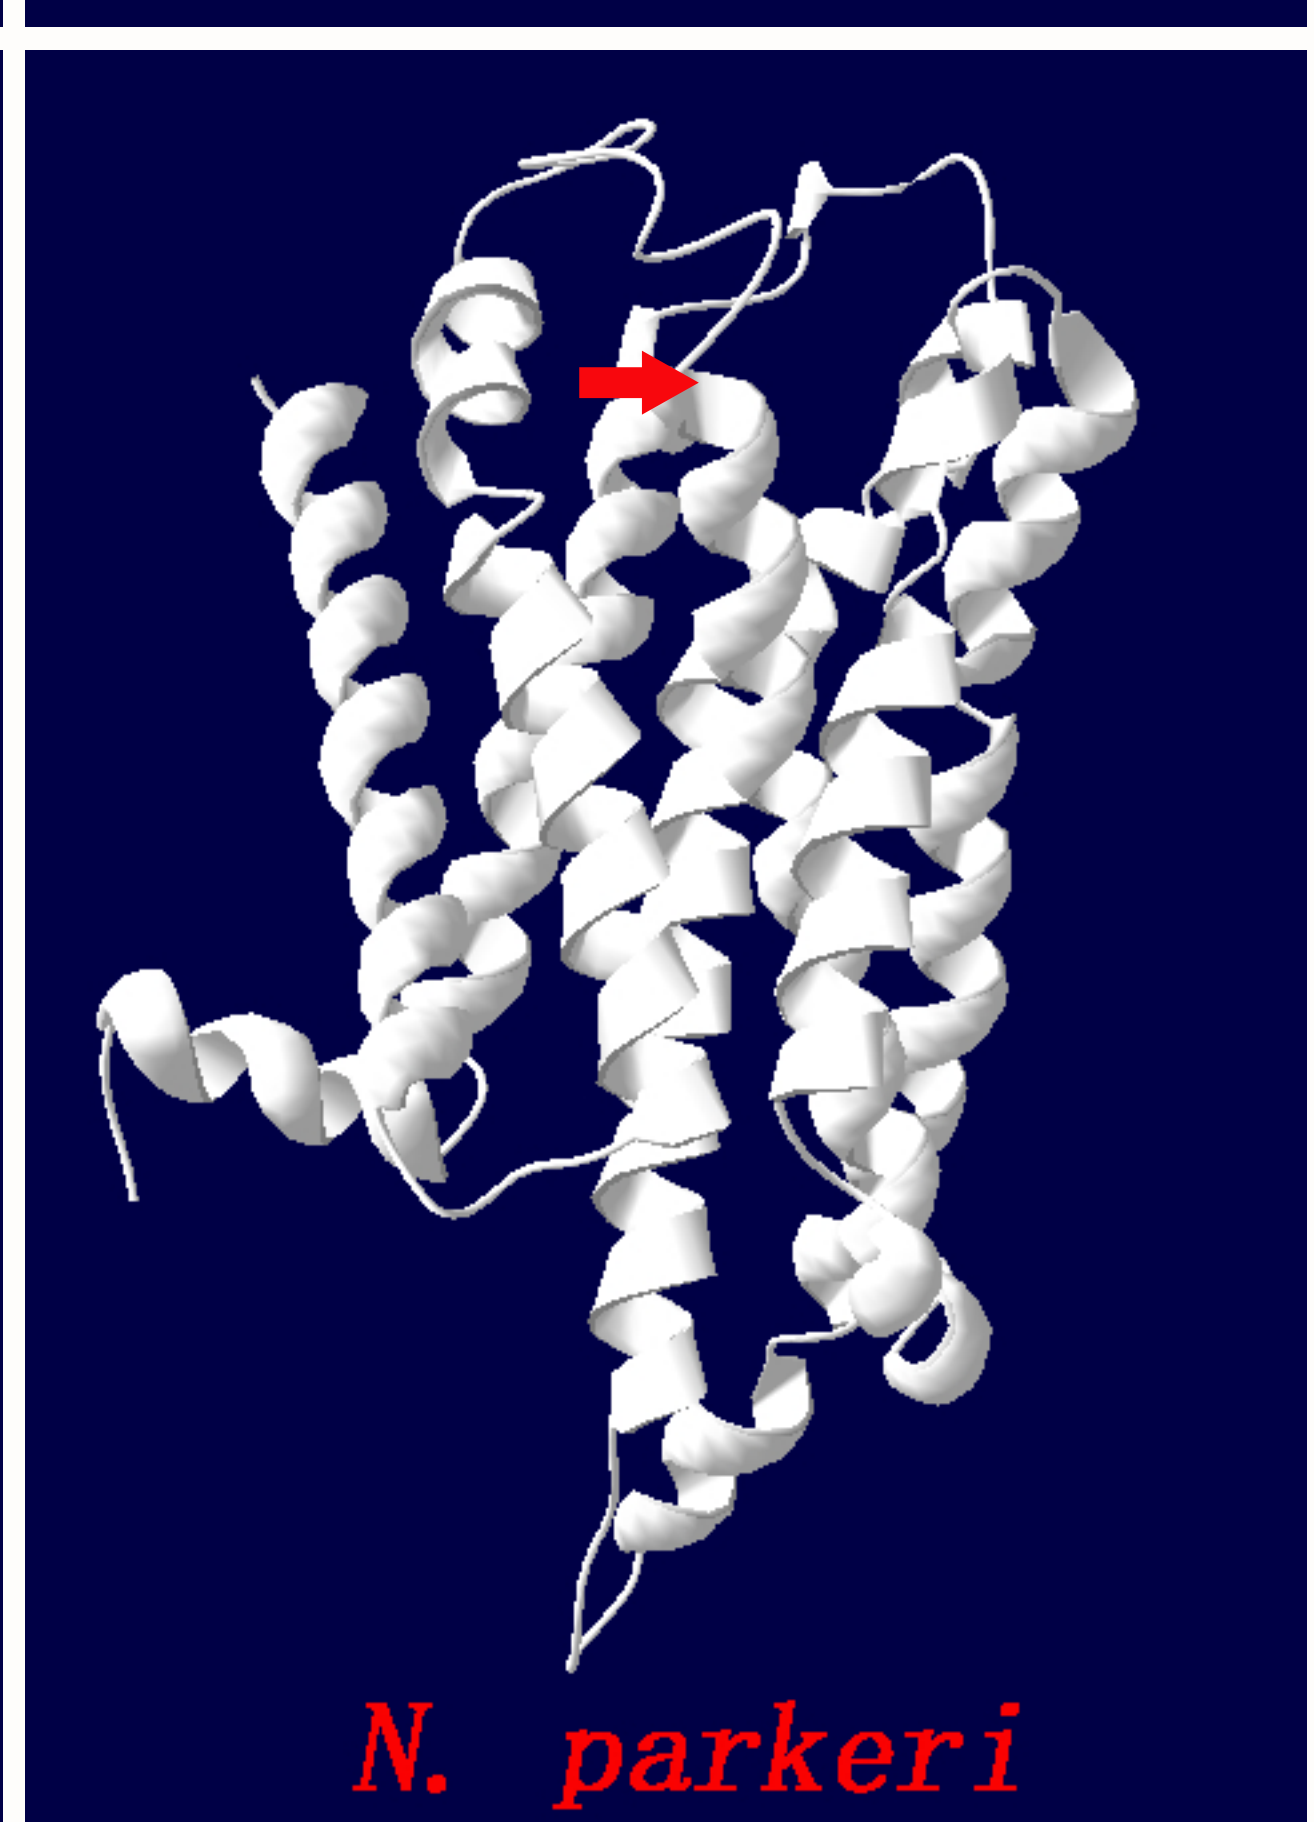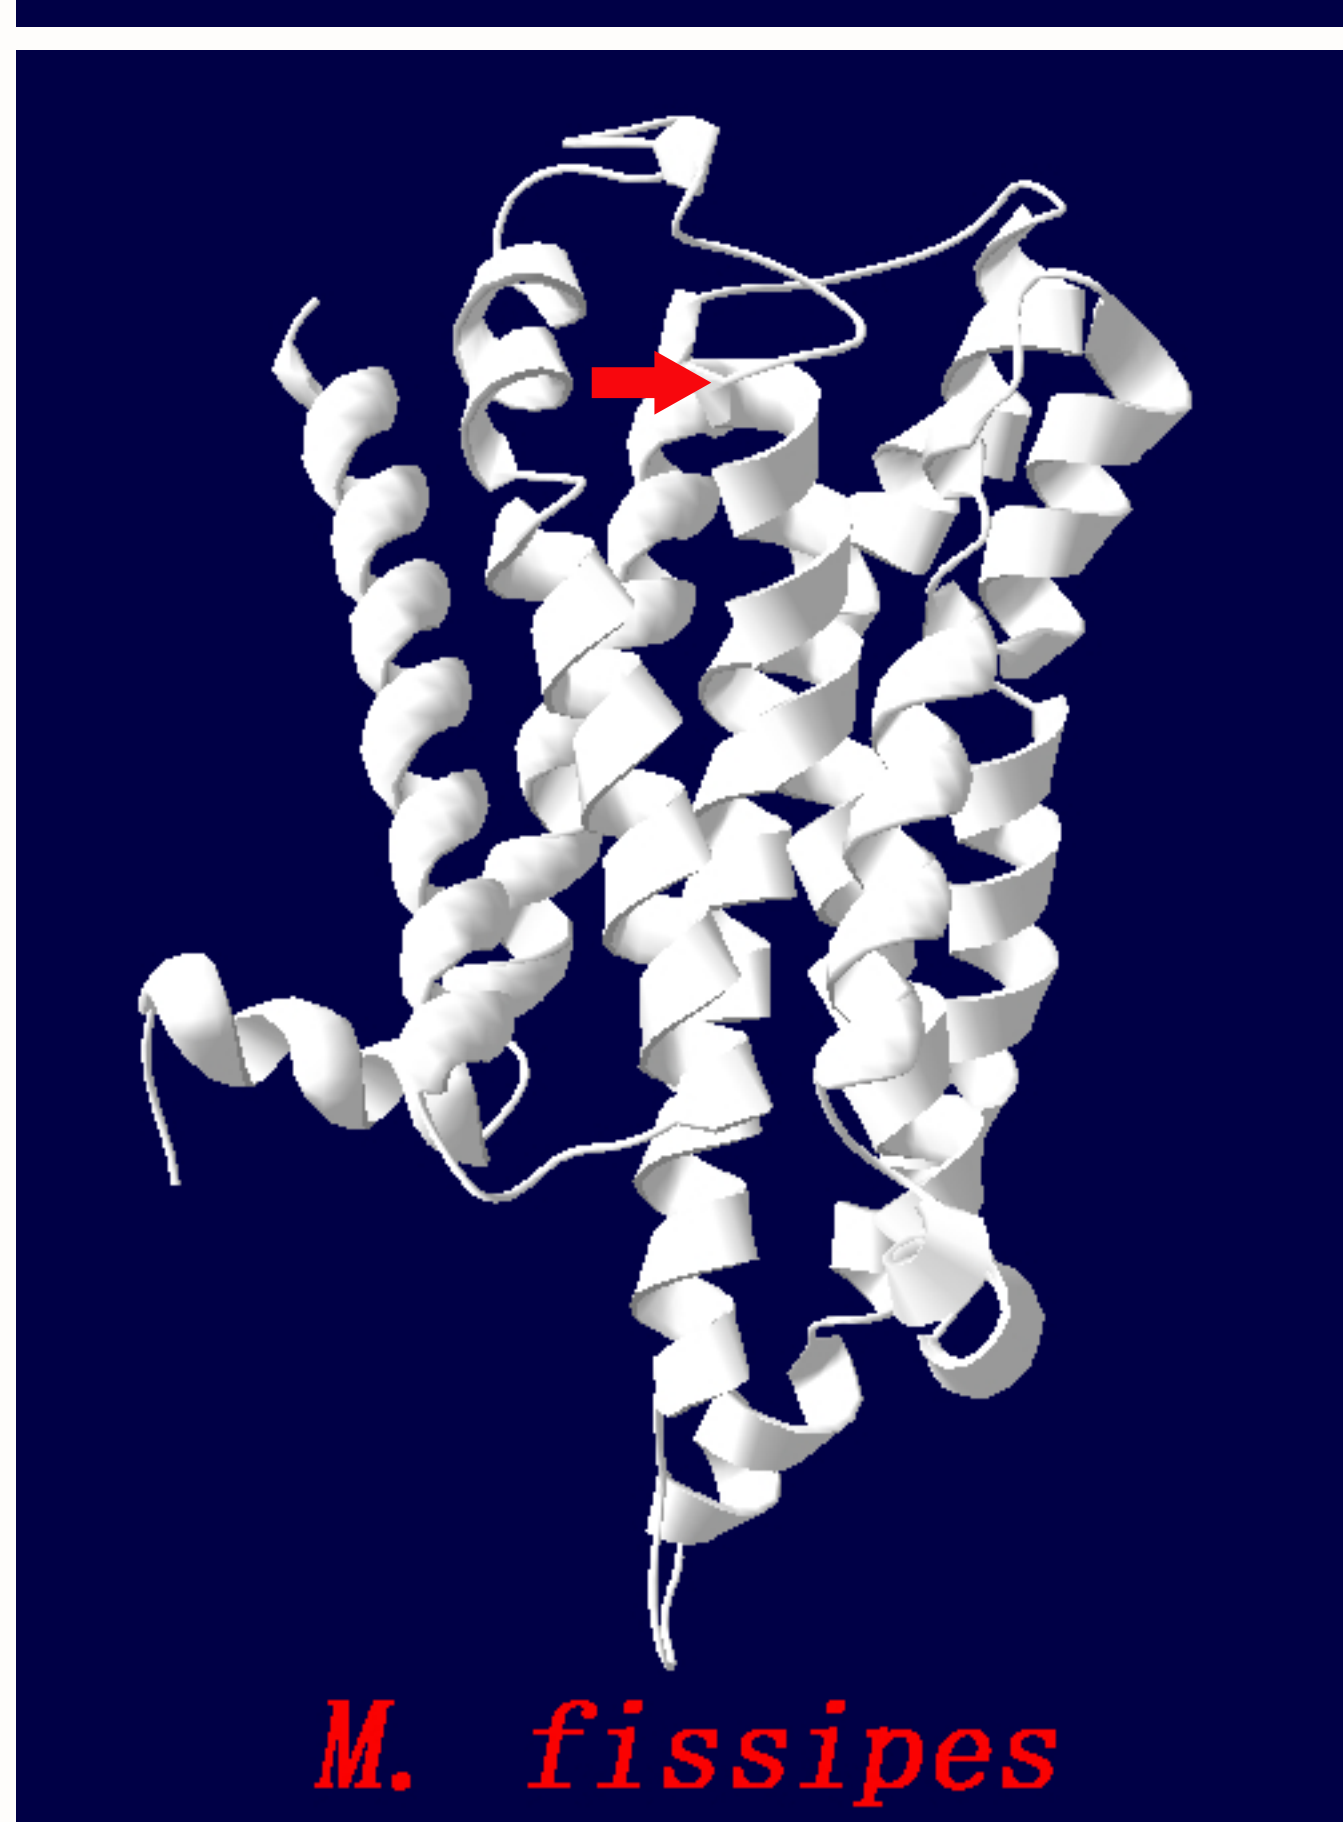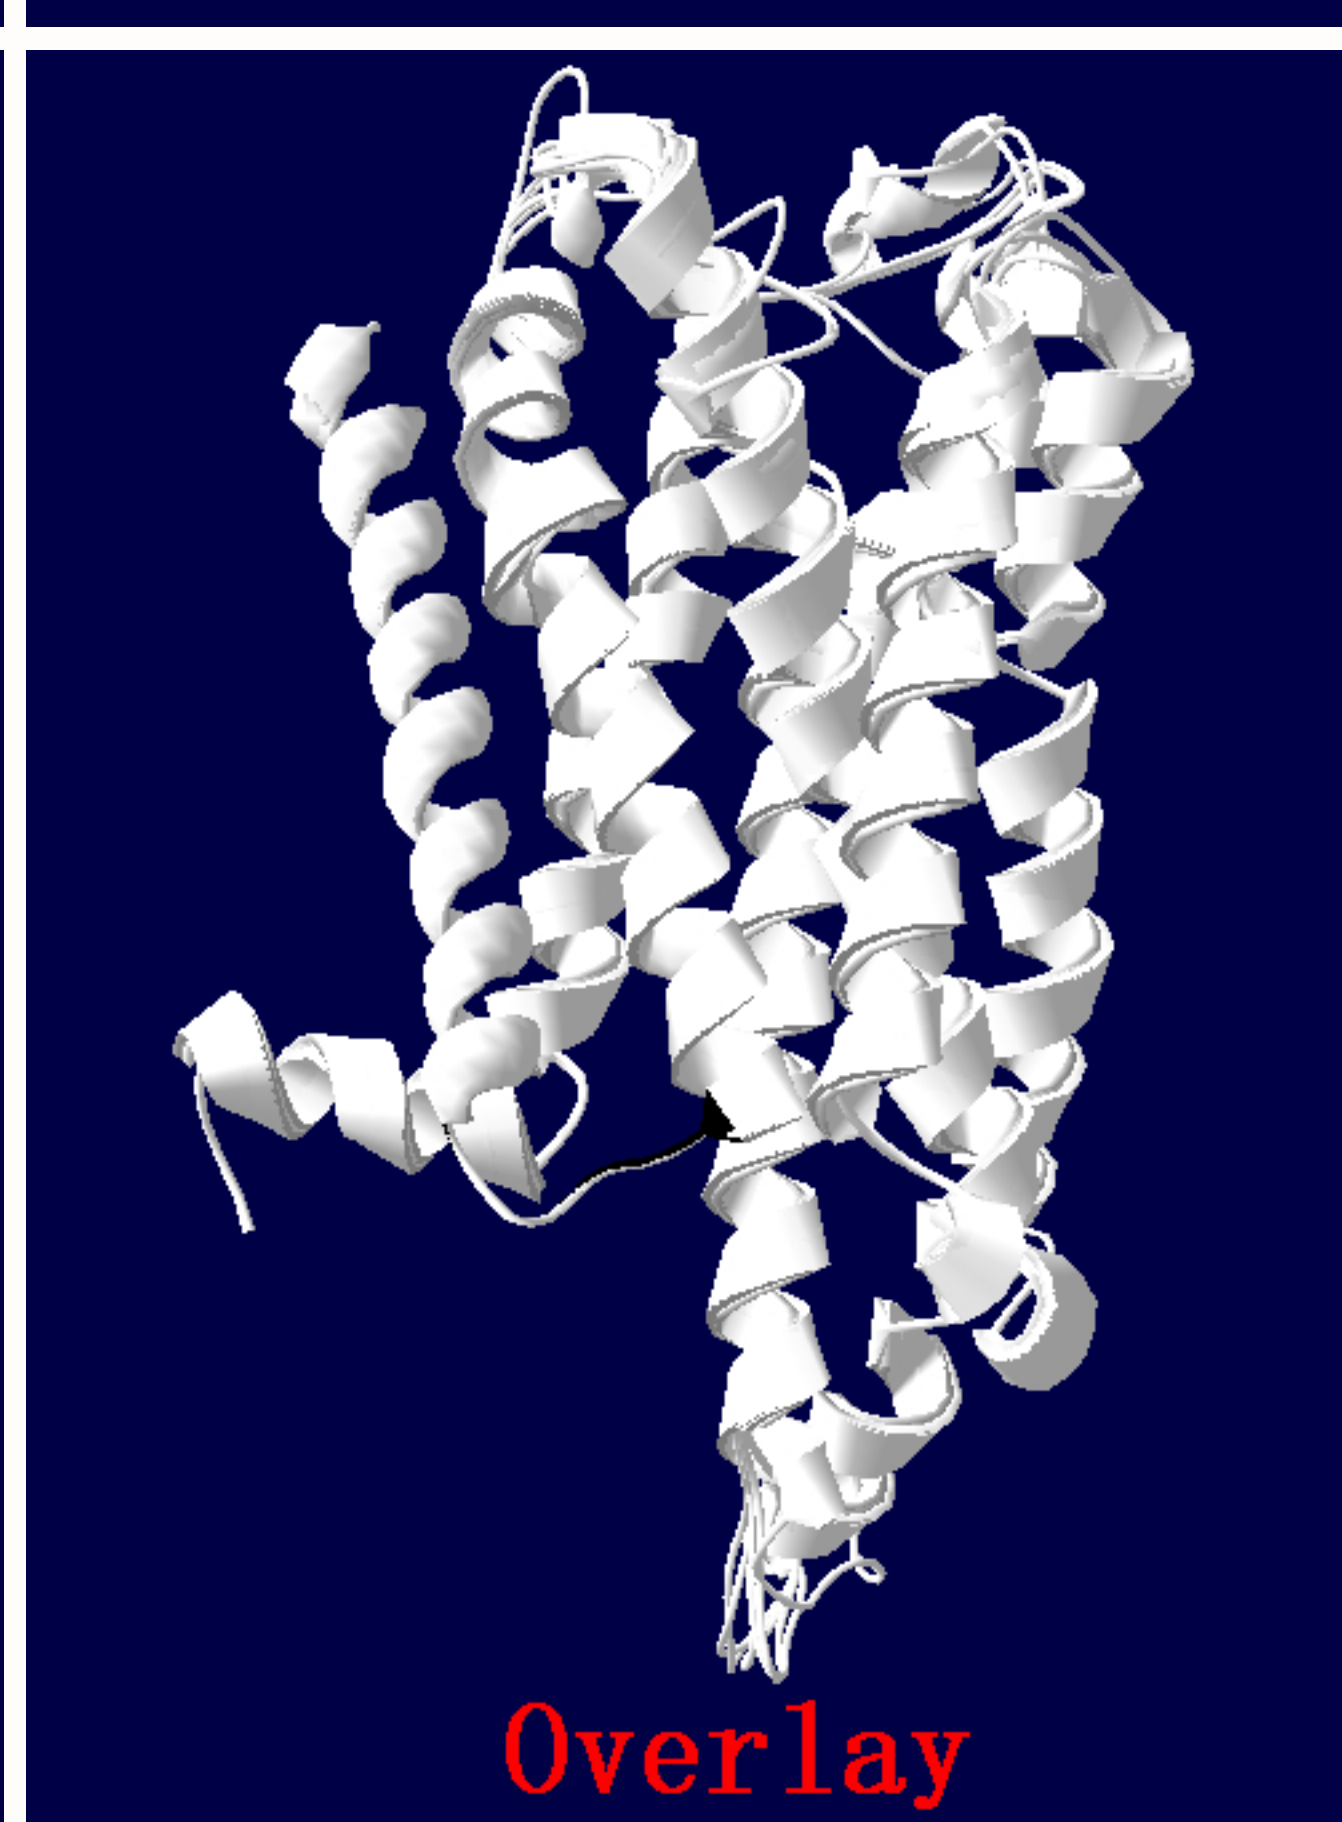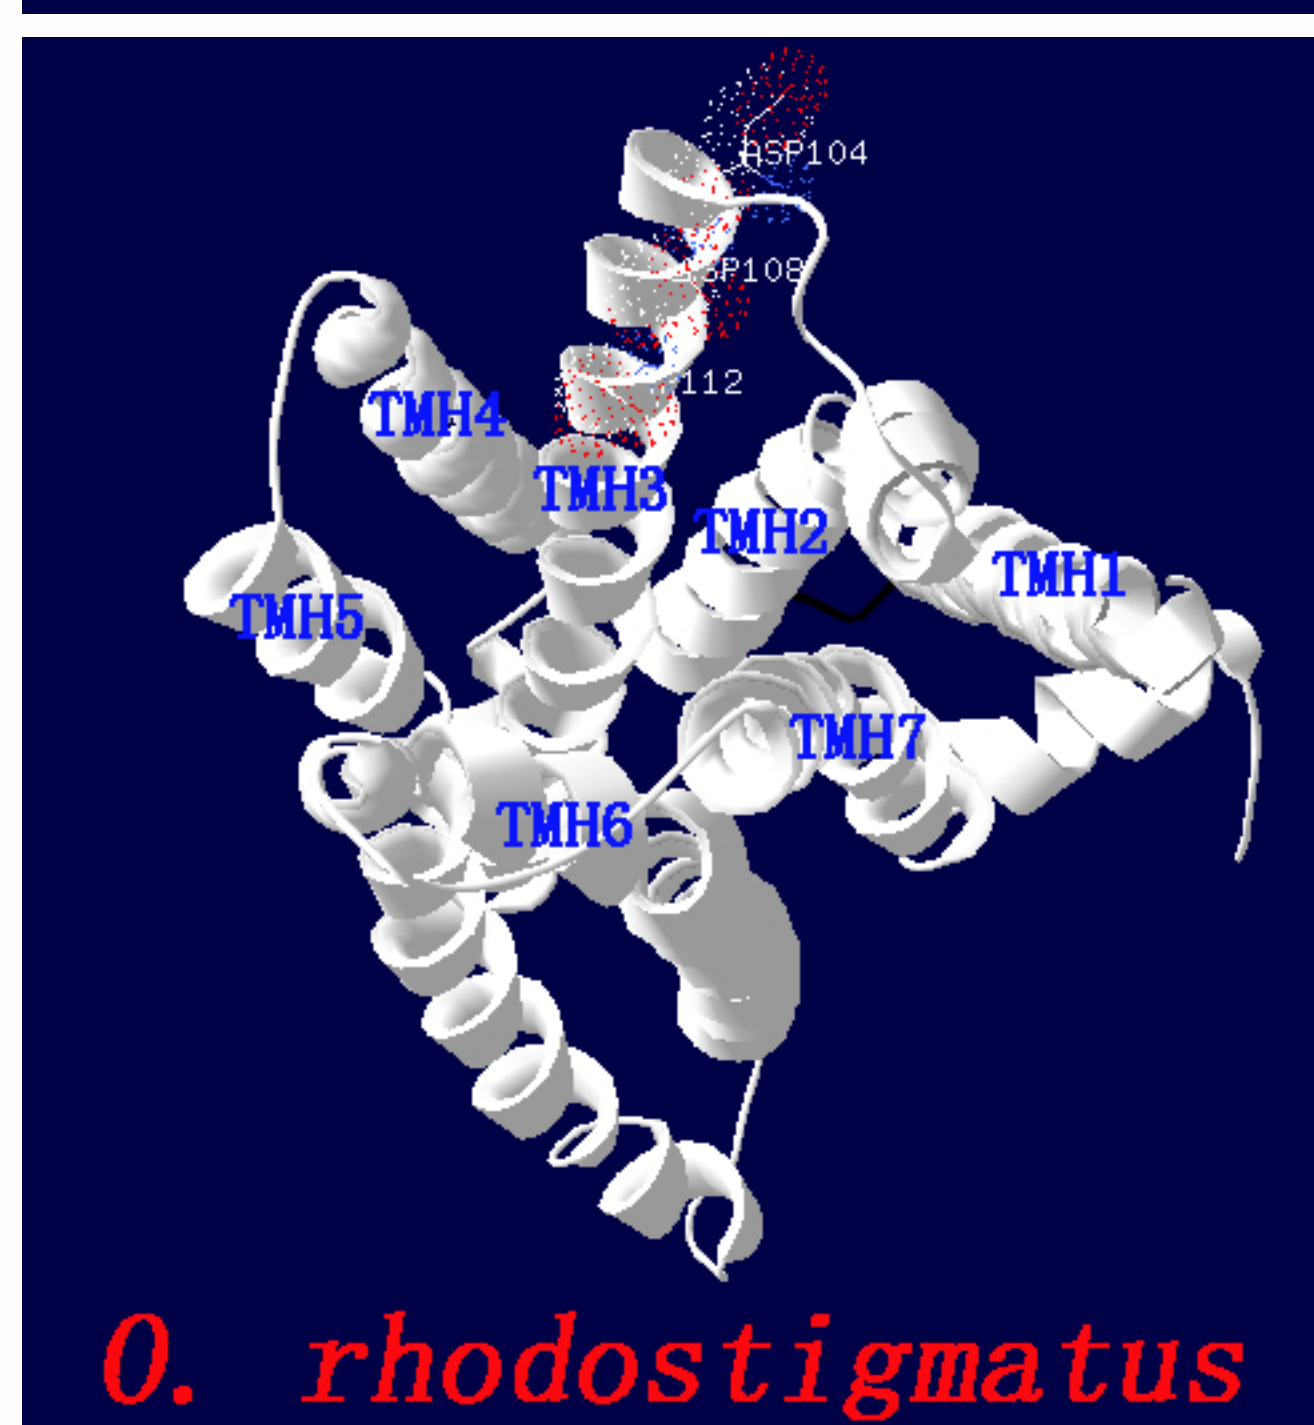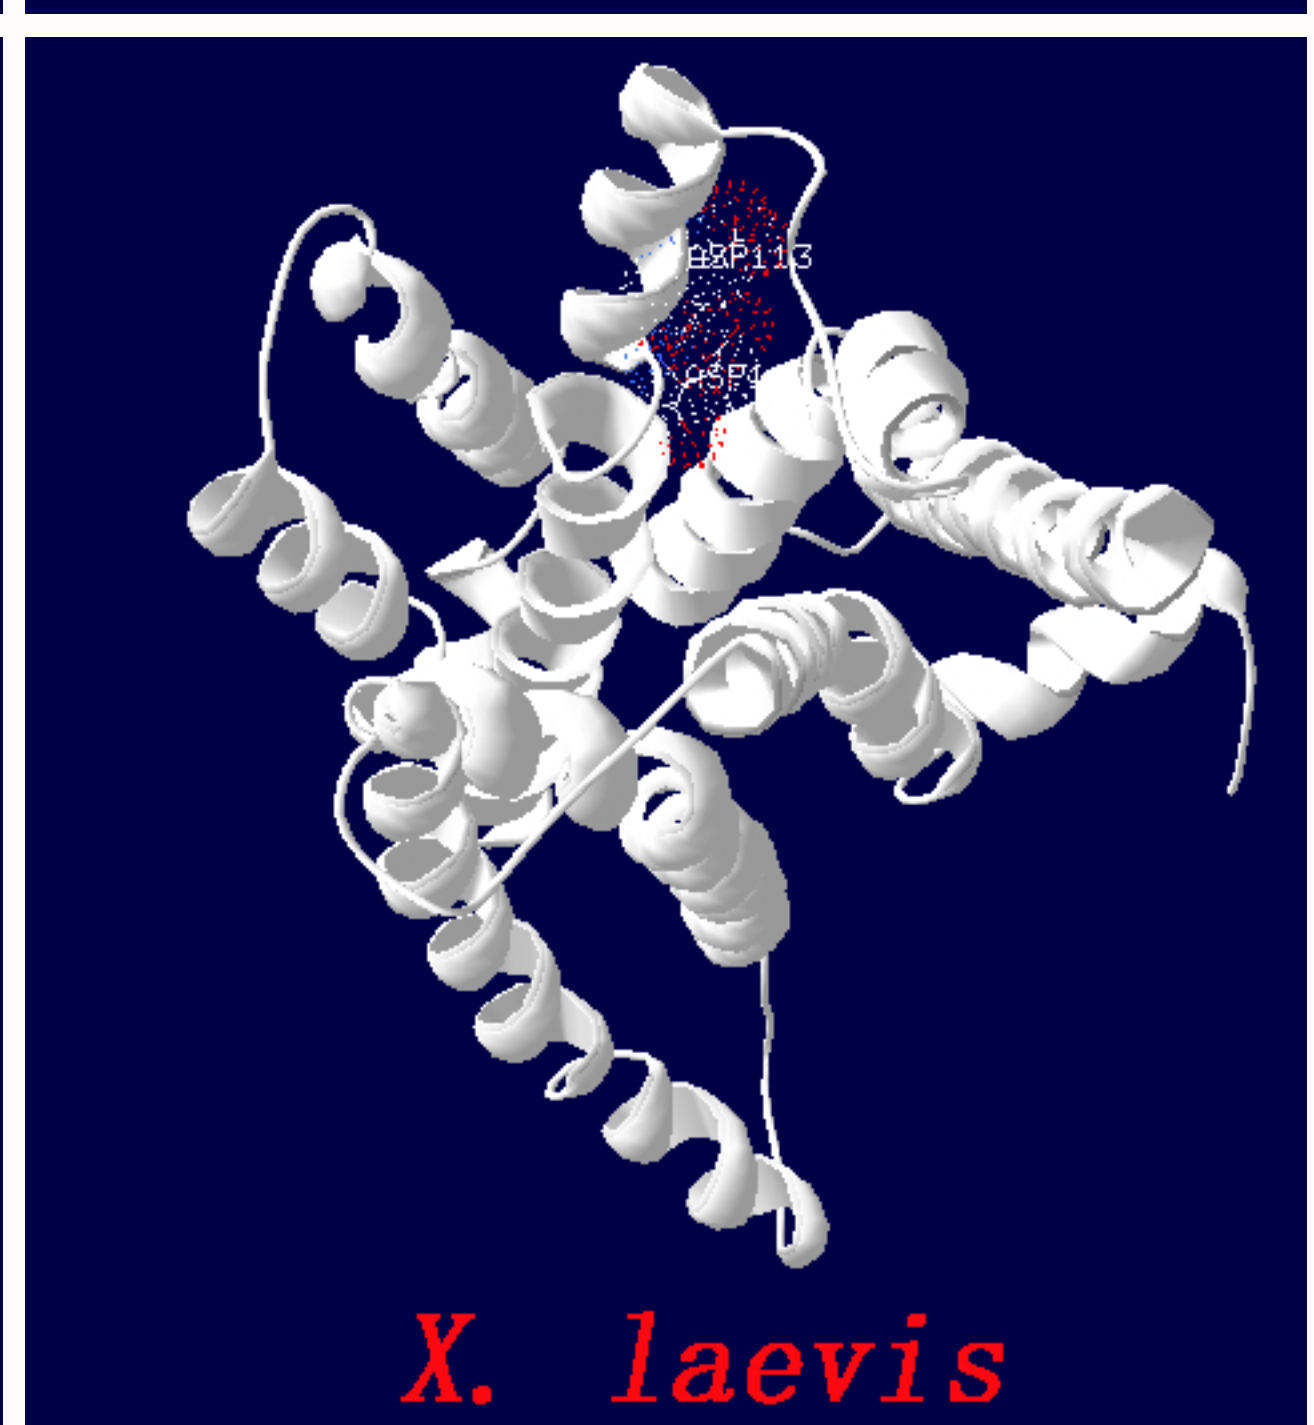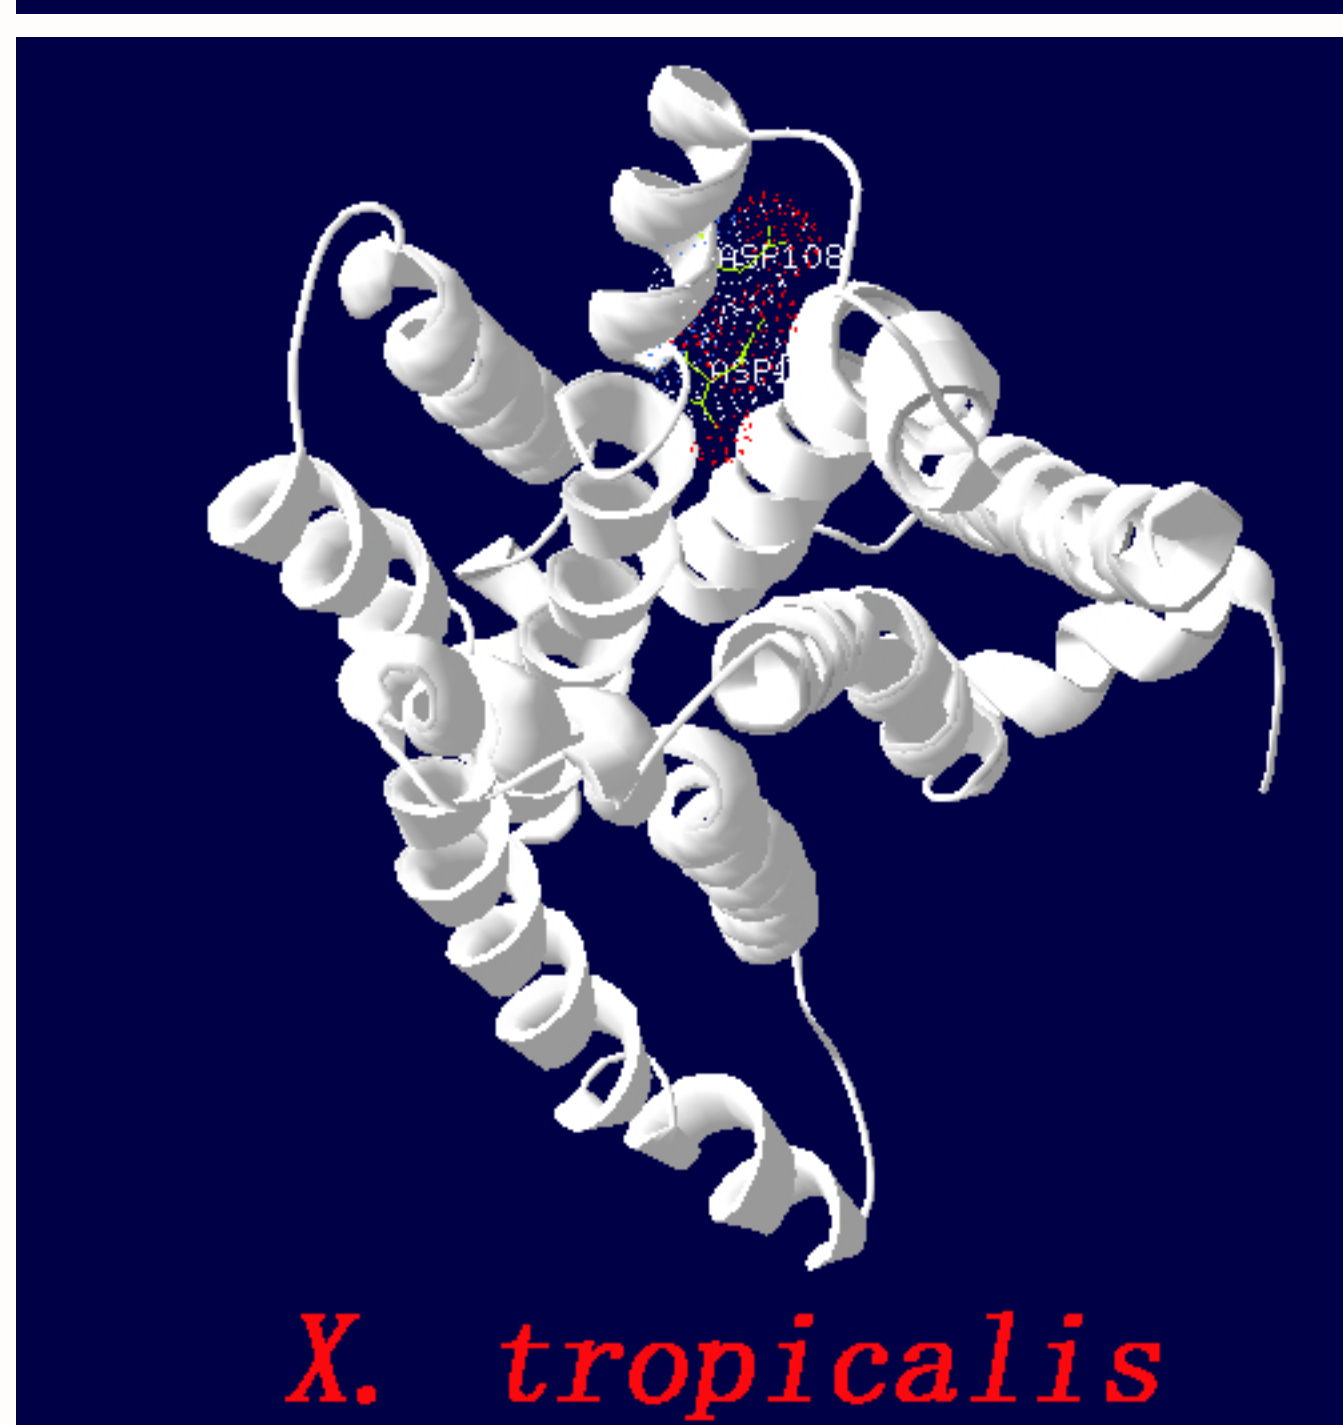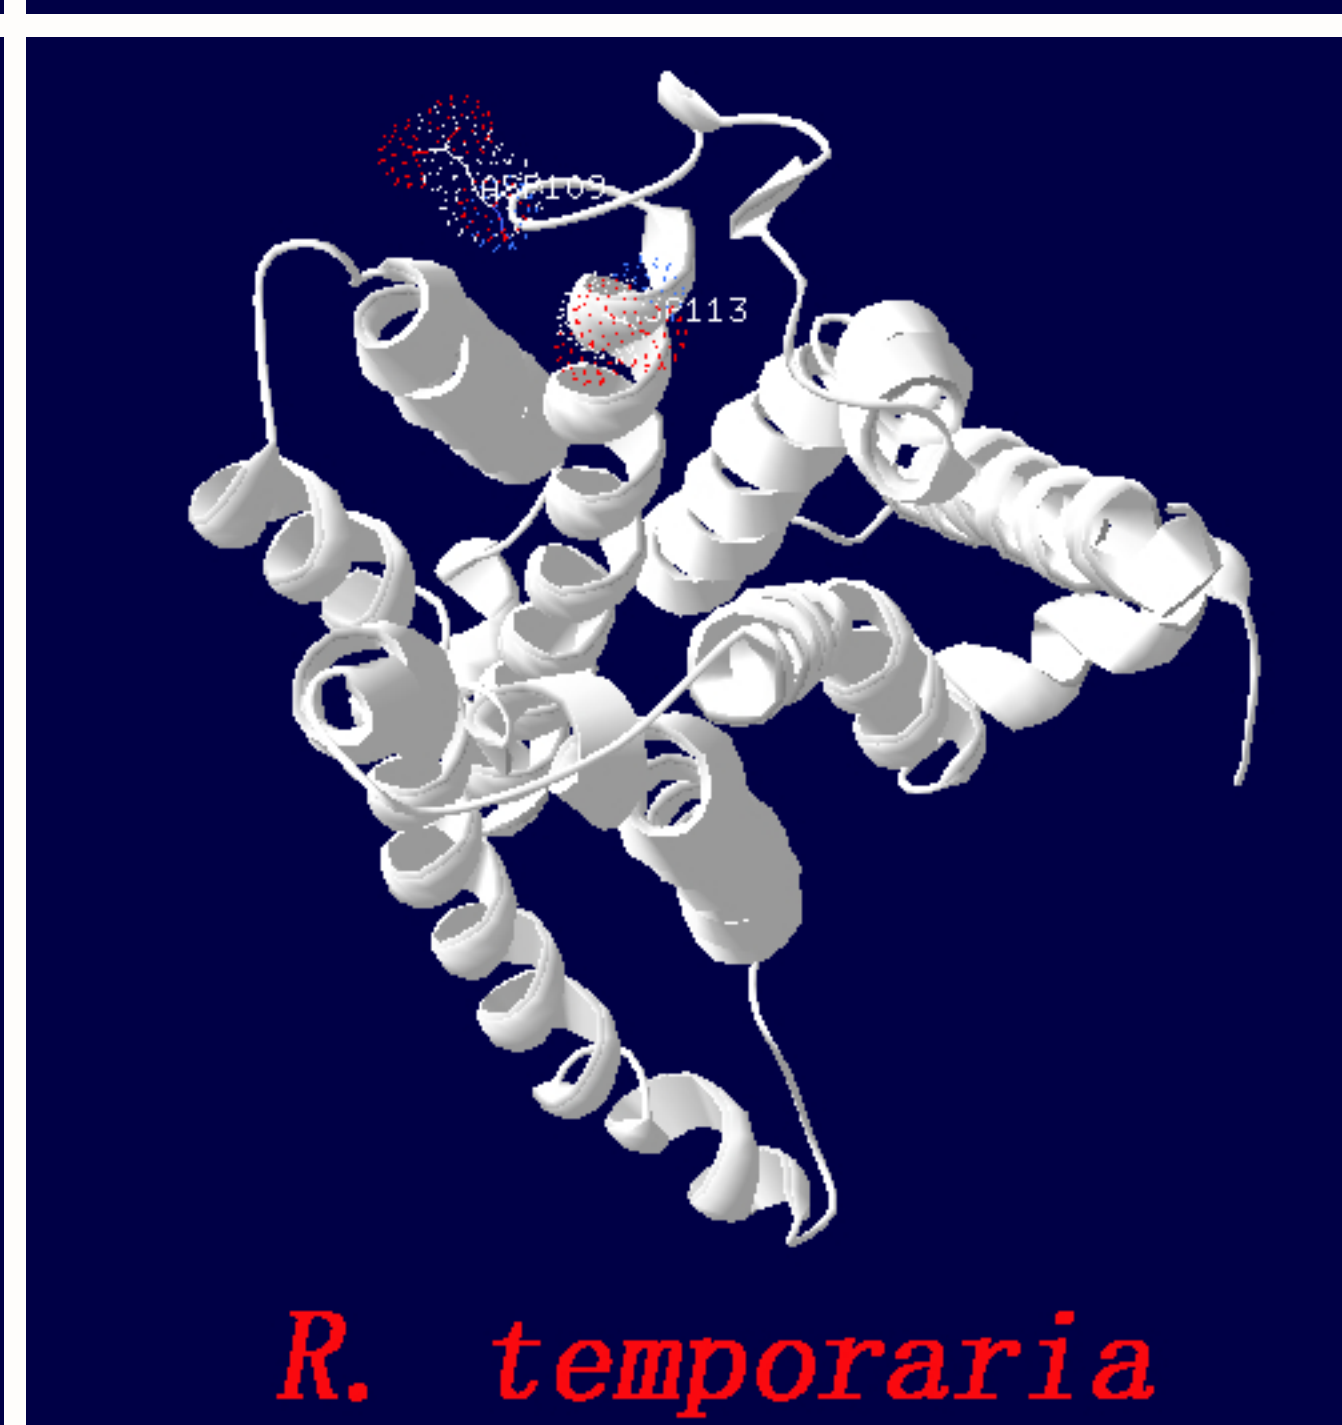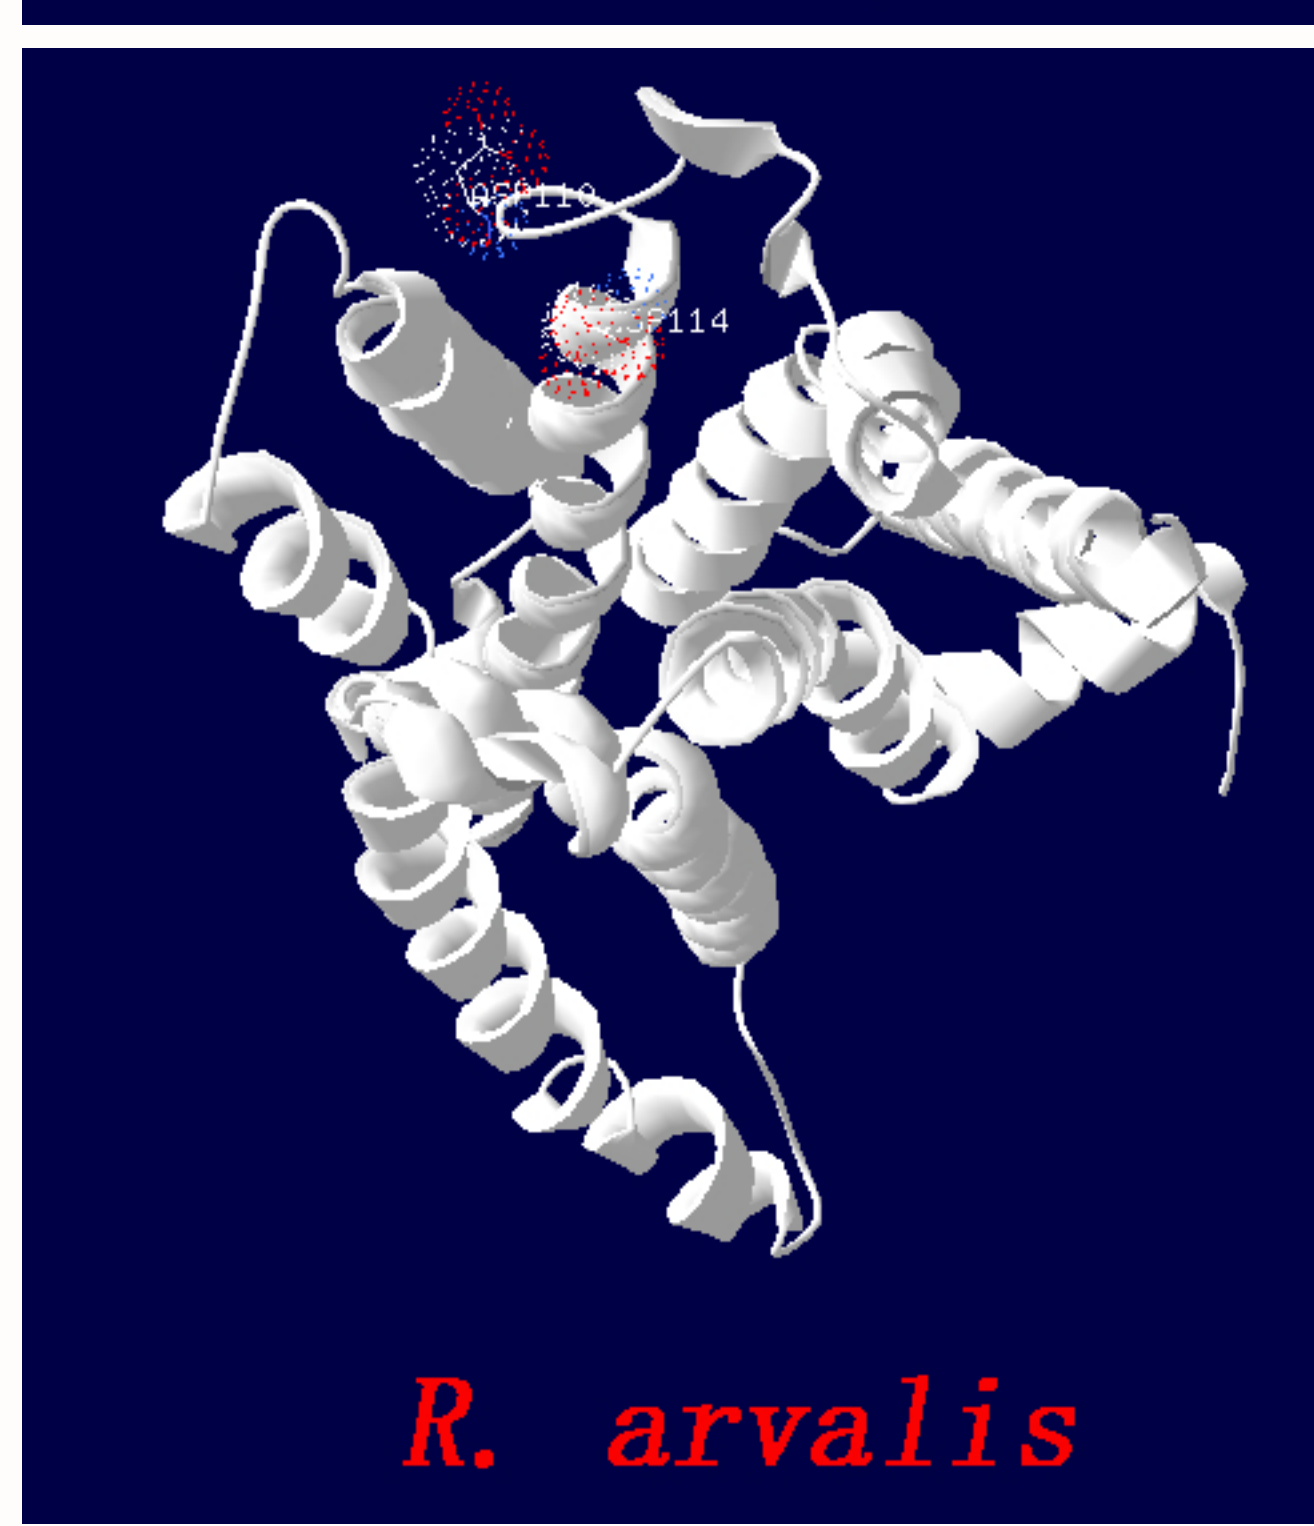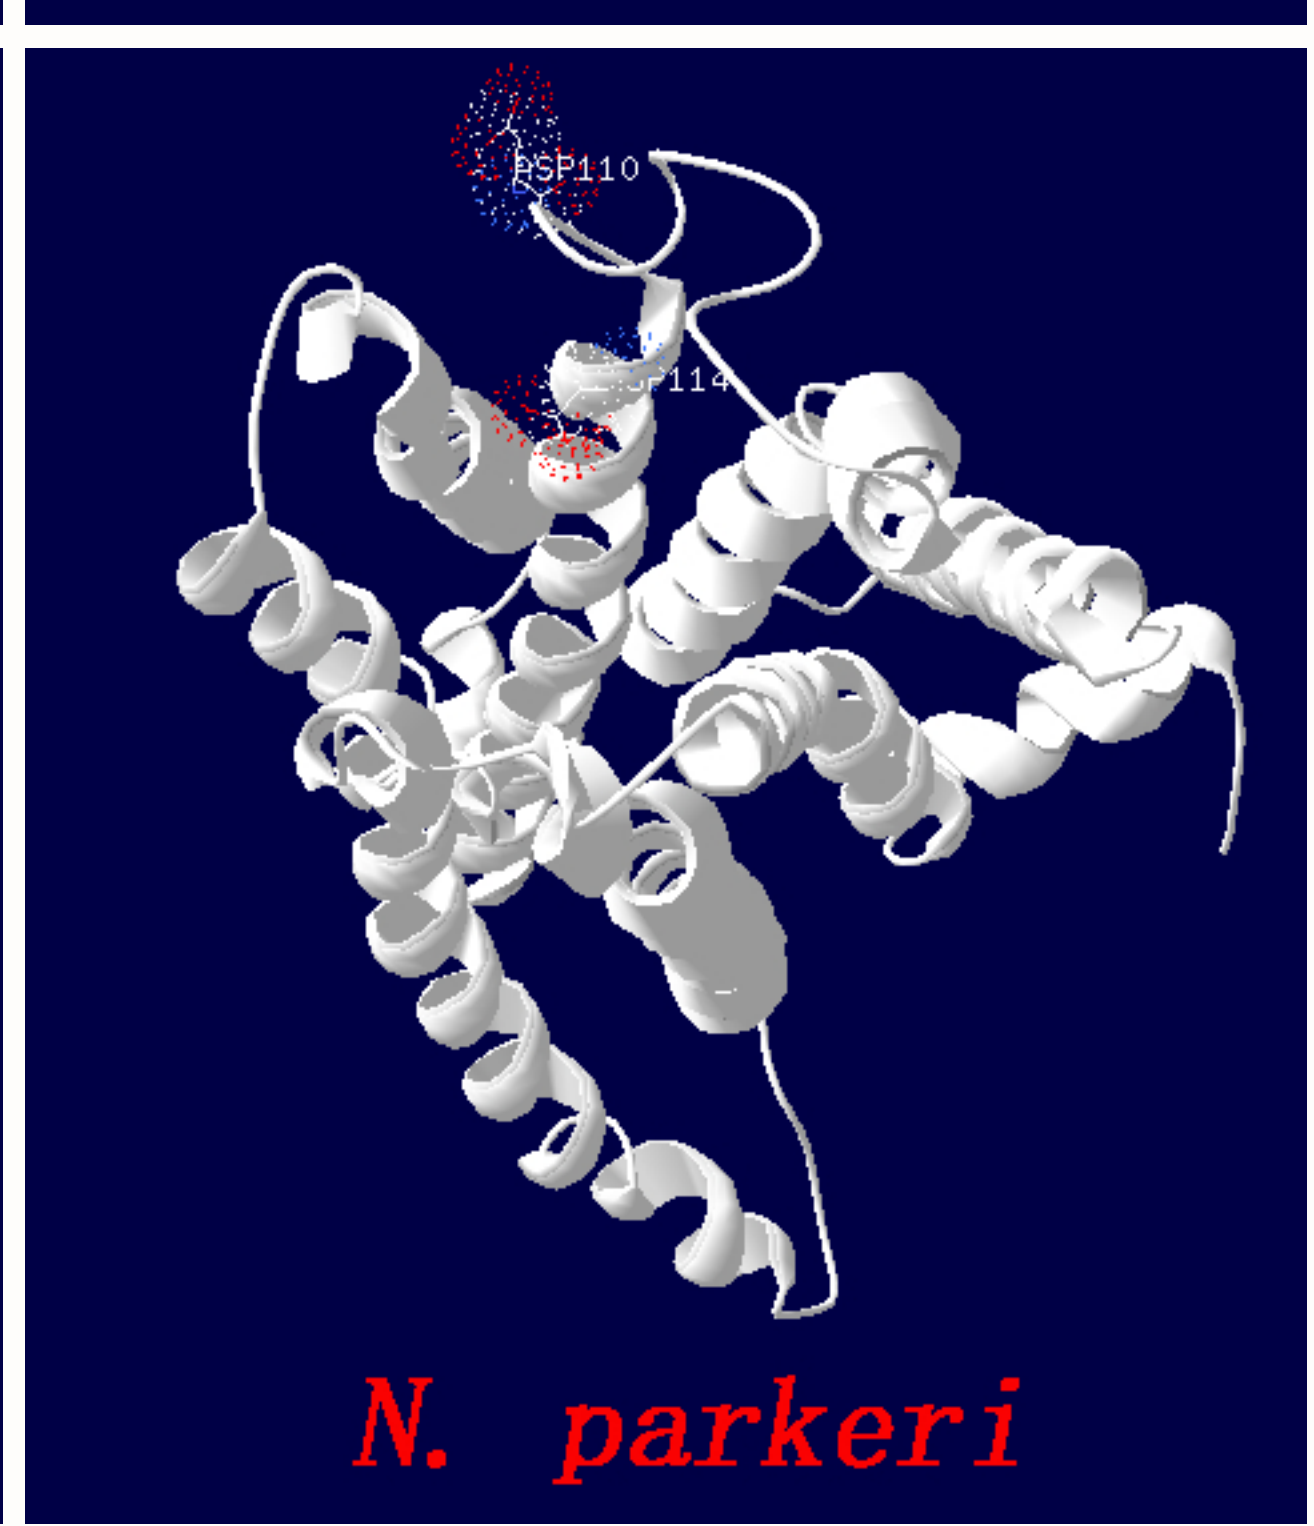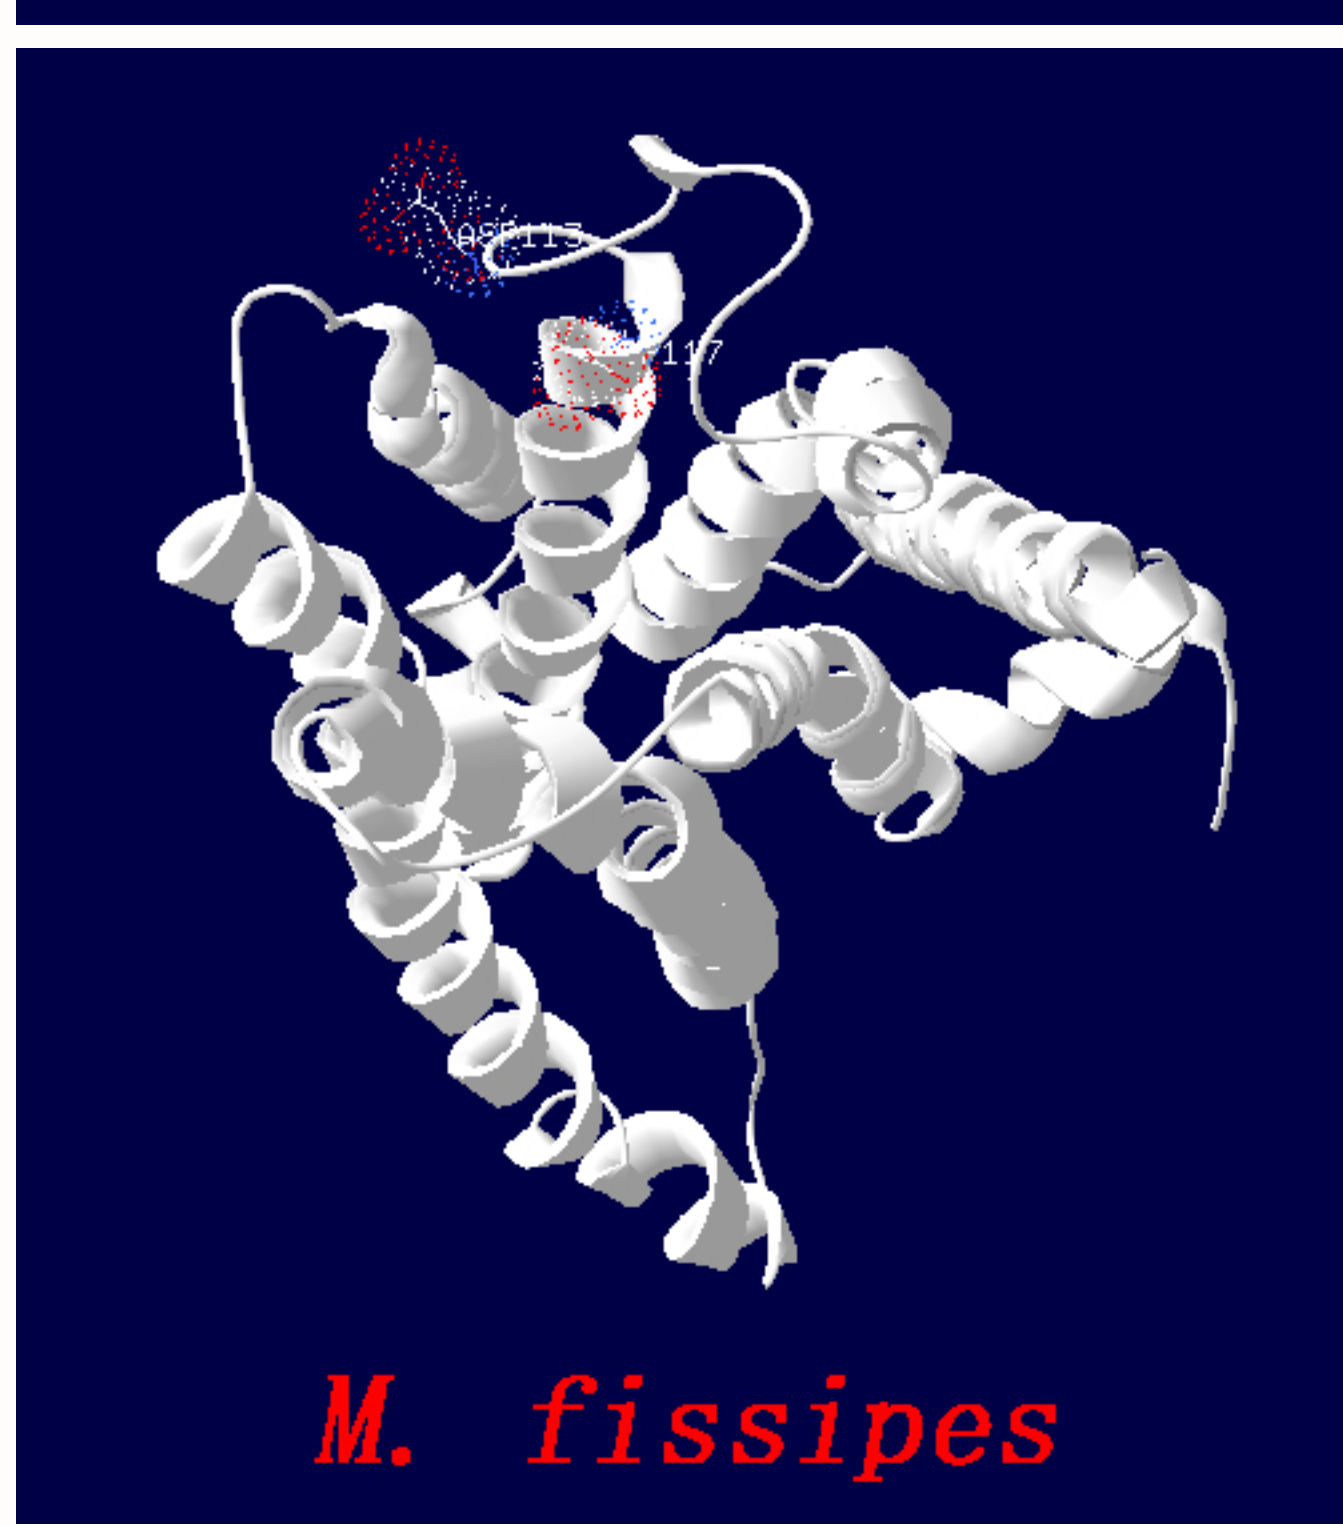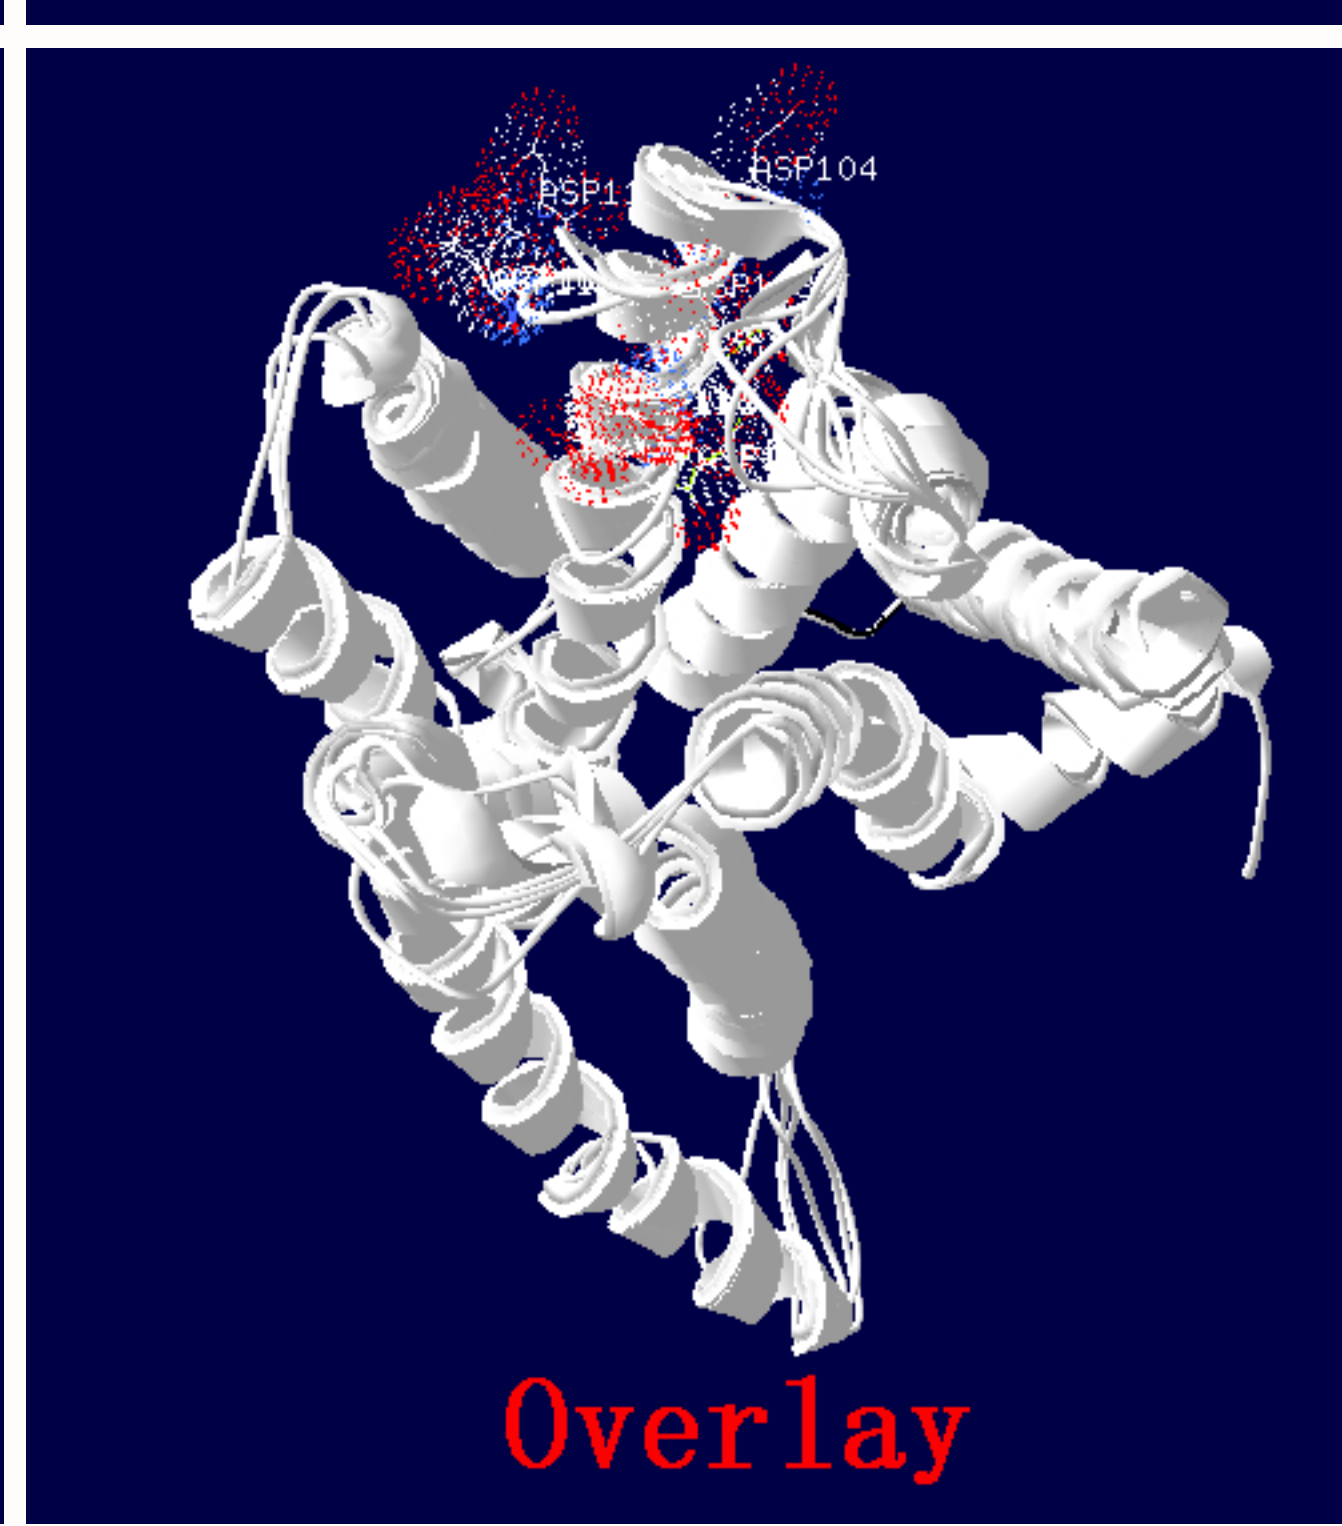

Supplement: 12864_2018_4790_MOESM7_ESM.pdf [file 12864_2018_4790_MOESM7_ESM.pdf]
